# Supplementary material
Source: HighWire-hosted journal article supplement (https://bmjopen.bmj.com/content/6/4/e011012)
Supplement: inline-supplementary-material-1 [file inline-supplementary-material-1.pdf]

Suppl. Table 1. Content analysis

| <b>Theme or keyword</b> | <b>Description</b>                                                                                     |
|-------------------------|--------------------------------------------------------------------------------------------------------|
| Personal experience     | <i>Referencing a personal experience</i>                                                               |
| Belief                  | <i>Appearance of the word belief or believe</i>                                                        |
| Financial               | <i>Included the word cost, pay or money</i>                                                            |
| Relationship            | <i>In reference to the physician-patient relationship</i>                                              |
| Psychosomatic           | <i>Included the word hypochondriac or psychosomatic</i>                                                |
| Herb                    | <i>Emphasis on the characteristics of herbs rather than placebos</i>                                   |
| Passive argument        | <i>Including a rendition of the phrases, “got better is all that matters” or, “last resort/option”</i> |
| Real                    | <i>As opposed to implied “fake”, in reference to the placebo or treatment</i>                          |
| Ethical                 | <i>The word ethical or ethics appeared in the response</i>                                             |
| [With an] Exception     | <i>Indication that the response was not all inclusive</i>                                              |
| Research                | <i>The idea that a placebo is related to research</i>                                                  |
| Alternative medicine    | <i>Appearance of the word or phrase alternative, natural or holistic medicine</i>                      |
| Guinea pig              | <i>The appearance of the words “guinea pig” in the response</i>                                        |
